# Supplementary material
Source: HighWire-hosted journal article supplement (https://cmaj.ca/highwire/filestream/71112/field_highwire_adjunct_files/1/180175-res-2-at.pdf)
Supplement: 180175-res-2-at.pdf [file 180175-res-2-at.pdf]

## Appendix 2 (as supplied by the authors): Reasons for nonuse of pain interventions

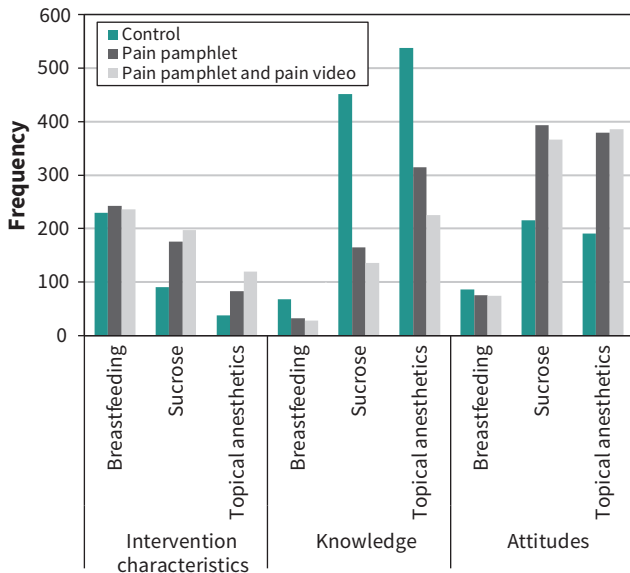

Appendix to: Taddio A, Shah V, Bucci L, et al. Effectiveness of a hospital-based postnatal parent education intervention about pain management during infant vaccination: a randomized controlled trial. *CMAJ* 2018. doi: 10.1503/cmaj.180175. Copyright © 2018 The Author(s) or their employer(s).

To receive this resource in an accessible format, please contact us at [cmajgroup@cmaj.ca](mailto:cmajgroup@cmaj.ca).
